# Supplementary material for: Glomerular filtration barrier modeling on a chip with tunable basement membrane deposition and 3D cultured podocytes
Source: Royal Society of Chemistry journal article supplement (doi:10.1039/d3lc00147d), 2023-01-01
Supplement: d3lc00147d1.pdf [file d3lc00147d1.pdf]

## Supplementary Information

### A Glomerular Filtration Barrier Modeling on a Chip with Tunable Basement

### Membrane Deposition and 3D cultured Podocytes

**Jaehoon Kim<sup>1,2</sup>, Hyunho Kim<sup>1,3</sup>, Jeong Suk Kang<sup>4,5</sup>, Eun Soo Lee<sup>6,7</sup>, Choon Hee Chung<sup>6,7</sup>, Hyun Jeong Oh<sup>1</sup>, YongTae Kim<sup>2,8,9,10</sup>, Seok Chung<sup>1,11\*</sup> and Eun Young Lee<sup>4,5\*</sup>**

<sup>1</sup>School of Mechanical Engineering, Korea University, Seoul, South Korea

<sup>2</sup>George W. Woodruff School of Mechanical Engineering, Georgia Institute of Technology, Atlanta, GA 30332, USA

<sup>3</sup>Center for Systems Biology, Massachusetts General Hospital, Harvard Medical School, Boston, MA, 02114, USA

<sup>4</sup>Department of Internal Medicine, Soonchunhyang University Cheonan Hospital, Cheonan, South Korea

<sup>5</sup>Institute of Tissue Regeneration, College of Medicine, Soonchunhyang University, Cheonan, South Korea

<sup>6</sup>Department of Internal Medicine, Yonsei University Wonju College of Medicine, Wonju, South Korea

<sup>7</sup>Institution of Genetic Cohort, Yonsei University Wonju College of Medicine, Wonju, South Korea

<sup>8</sup>Parker H. Petit Institute for Bioengineering and Bioscience, Georgia Institute of Technology, Atlanta, GA 30332, USA

<sup>9</sup>Wallace H. Coulter Department of Biomedical Engineering, Georgia Institute of Technology, Atlanta, GA 30332, USA

<sup>10</sup>Institute for Electronics and Nanotechnology, Georgia Institute of Technology, Atlanta, GA 30332, USA

<sup>11</sup>KU-KIST Graduate School of Converging Science and Technology, Korea University, Seoul, South Korea

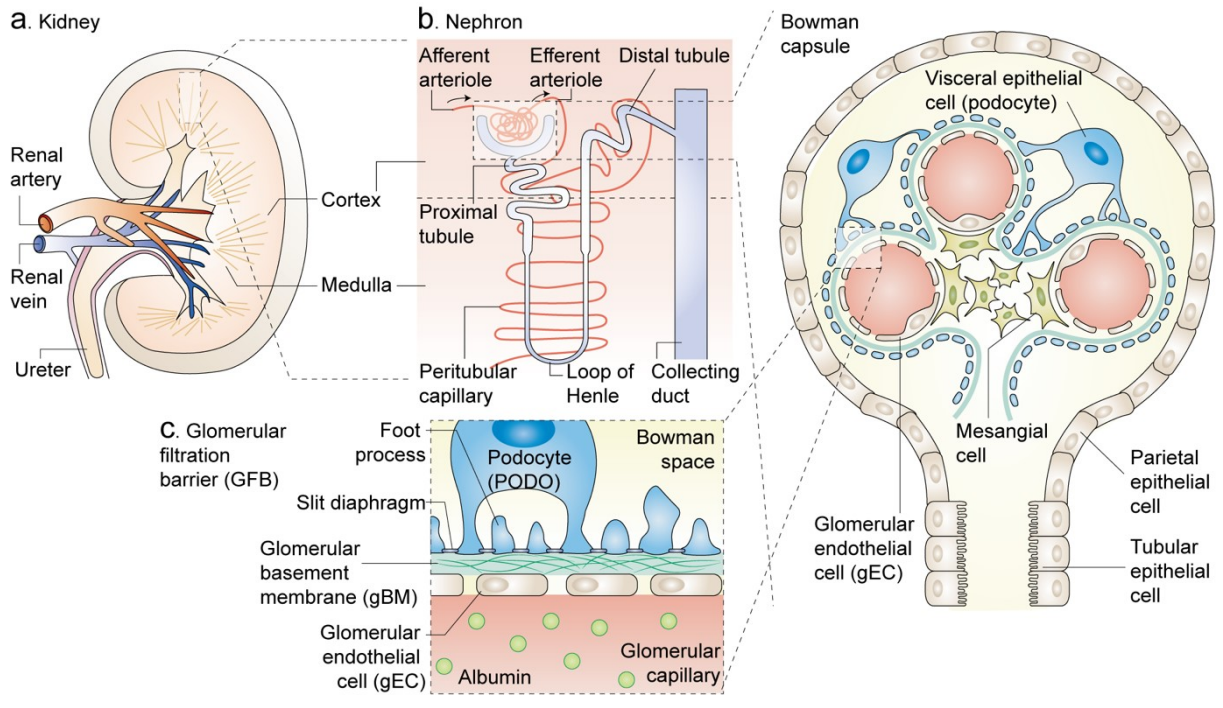

**Fig. S1** (a) Structure of kidney, (b) nephron, and (c) glomerular filtration barrier.

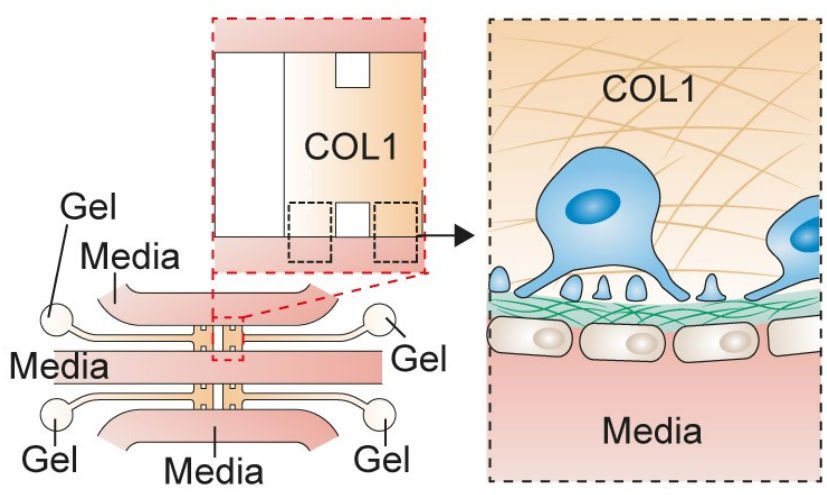

**Fig. S2** Schematic images showing region of interest in the microfluidic device.

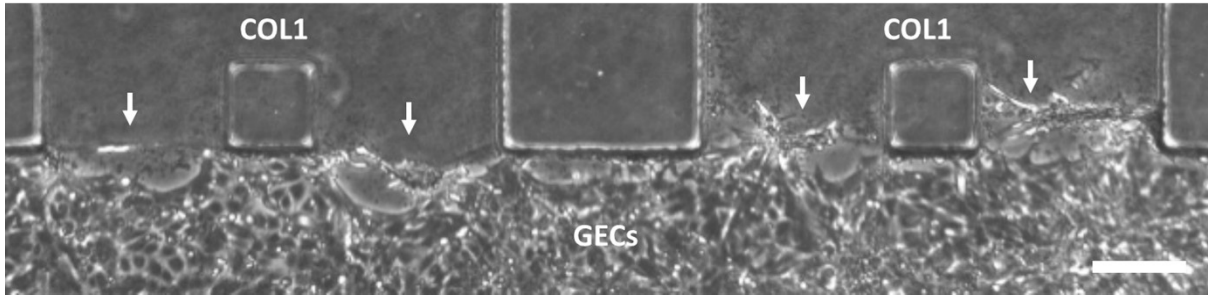

**Fig. S3.** gECs showing instability in a microfluidic chip in a previously reported endothelial cell culture condition (condition in <sup>18,20</sup>). Arrows indicate detachment of gECs. Scale bar is 150  $\mu\text{m}$ .

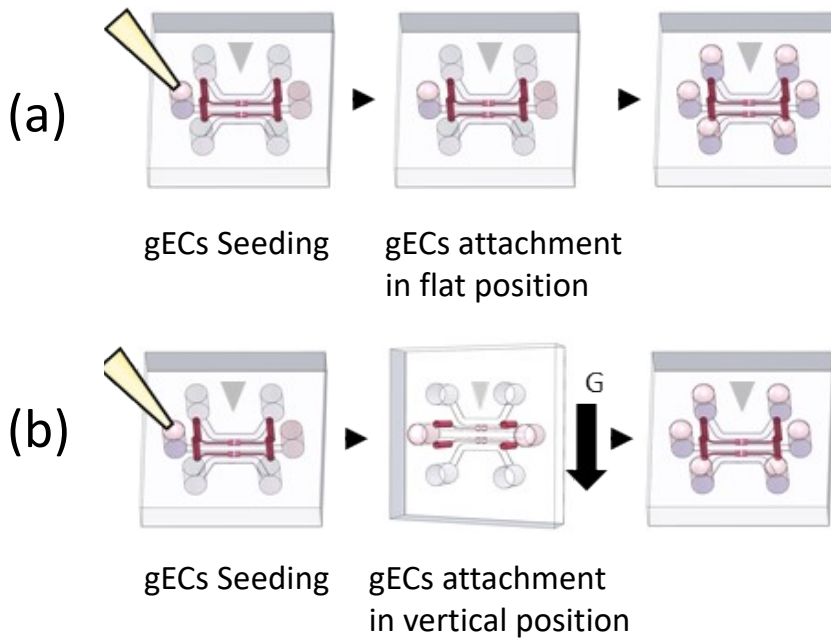

**Fig. S4.** Schematic of gEC attachment guidance design. (a) flat position and (b) vertical position during gECs attachment after cell seeding. In vertical position, gECs were guided by gravity to attach side wall of COL1.

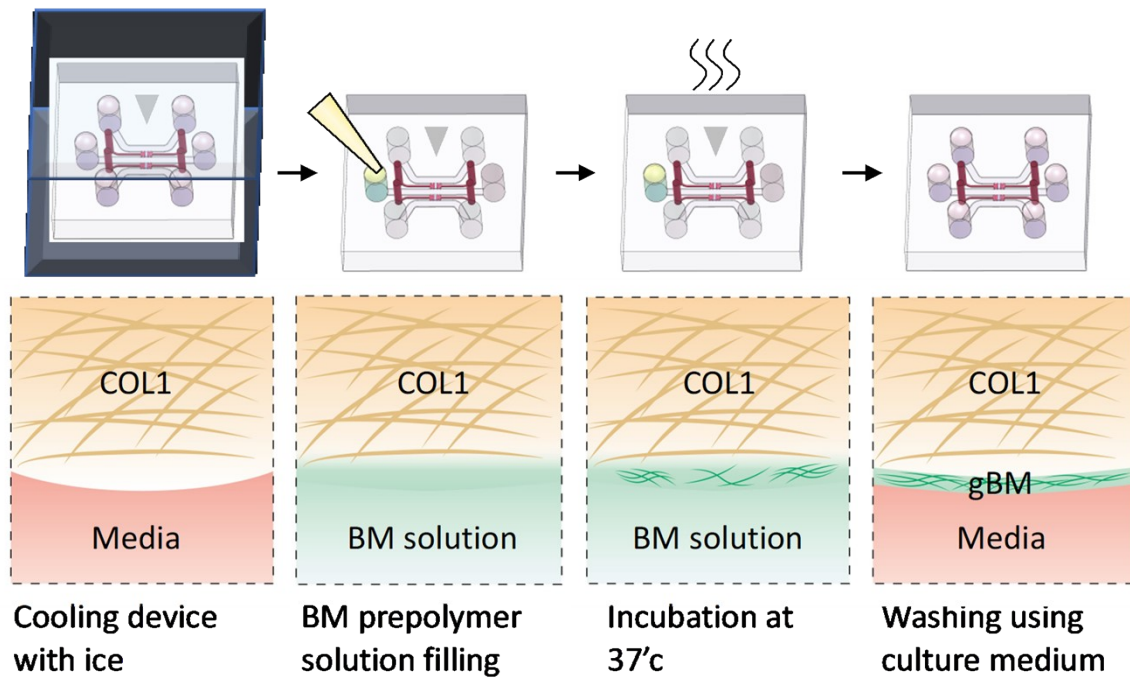

Fig. S5 Schematic of synthetic gBM deposition process.

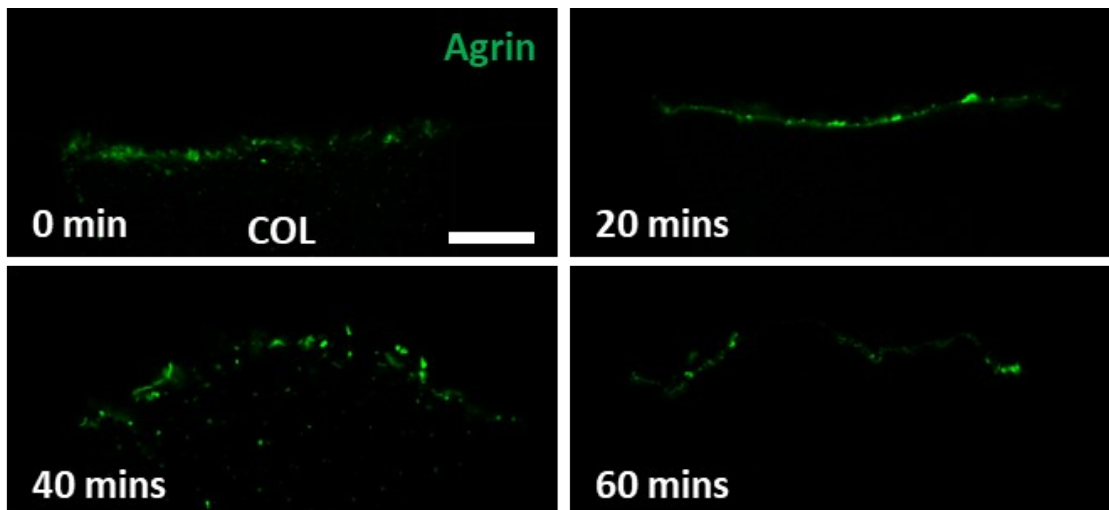

Fig. S6 Representative images of agrin in synthetic gBM according to deposition time. Scale bar is 50  $\mu\text{m}$ .

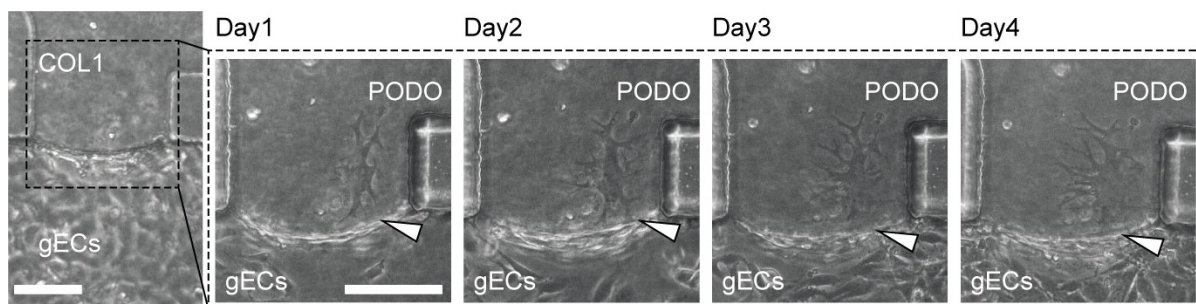

**Fig. S7** 3D morphological change of a PODO in COL1 hydrogel near gEC monolayer. Arrowhead indicates protrusion of PODO toward gEC monolayer. Scale bar is 150  $\mu\text{m}$

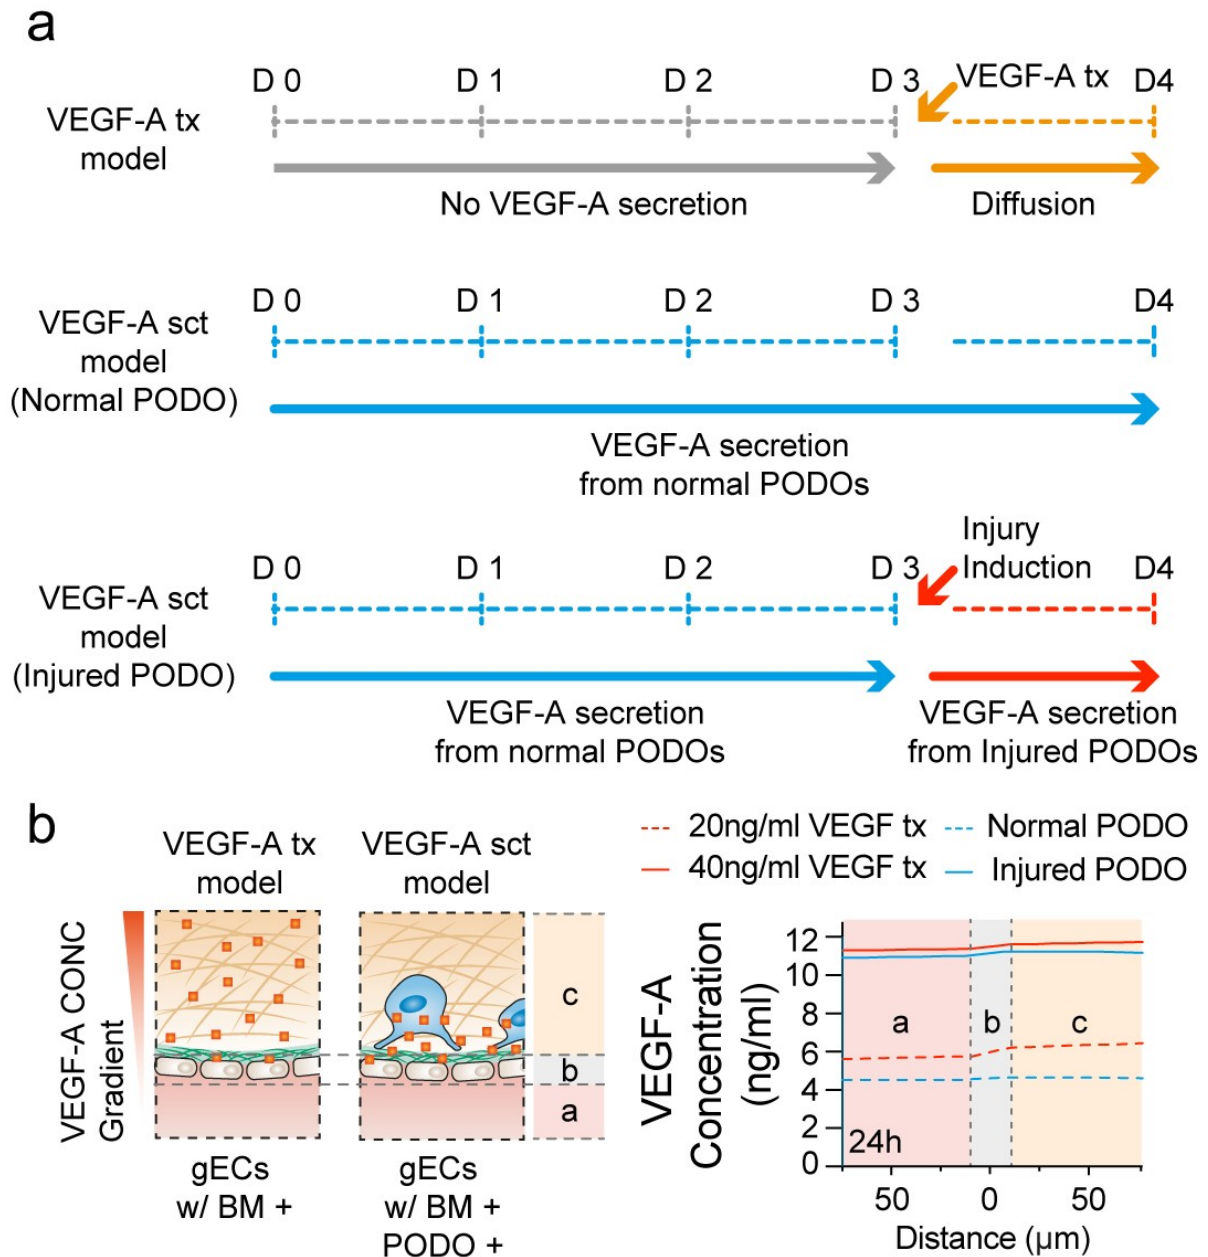

**Fig. S8** Computational simulation for VEGF-A transport in case of VEGF-A treatment (VEGF-A tx) and VEGF-A secretion from the podocytes (VEGF-A sct) in the microfluidic device (a) Simulation timeline for mimicking experimental timeline. (b) Schematic of VEGF-A tx model and VEGF-A sct model (Left). VEGF-A concentration profile at a, b, and c region (Right).

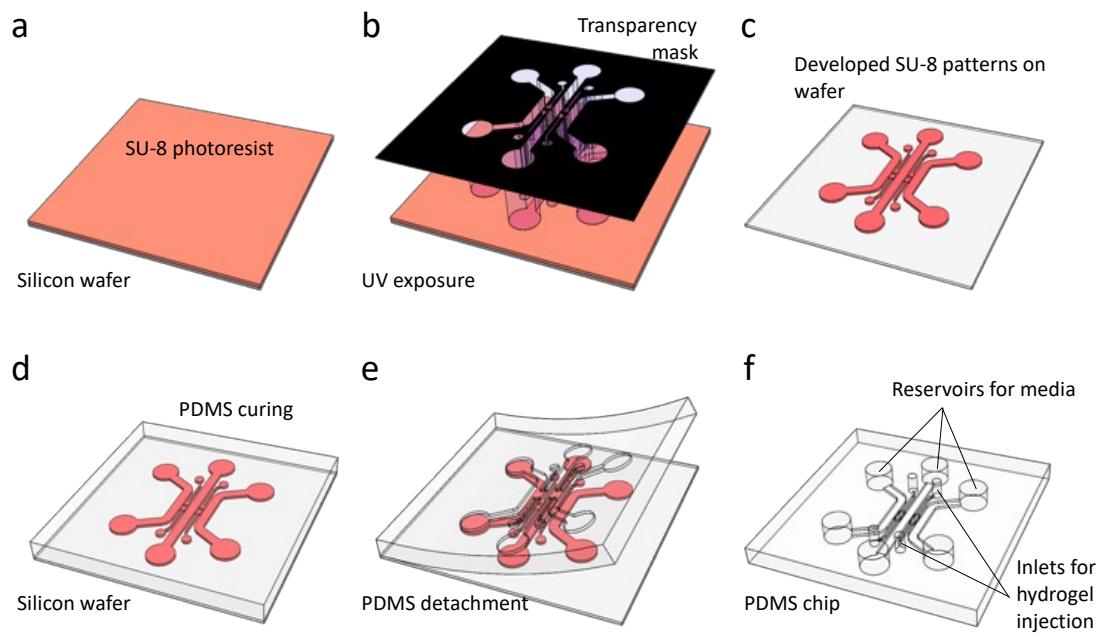

**Fig. S9** Microfluidic device fabrication process using soft lithography. (a) Silicon wafer spin coated with SU-8. (b) UV exposure through transparency photomask. (c) Developed SU-8 patterns. (d) Cured PDMS on SU-8 patterns. (e) Detached PDMS. (f) Trimmed and punched PDMS chip.

| Gene  | Forward                 | Reverse                |
|-------|-------------------------|------------------------|
| SYNPO | CTTTGGGGAAGAGGCCGATTG   | GTTTTCGGTGAAGCTTGTGC   |
| WT1   | CAGATGAACCTAGGAGCTACCTT | TGCCCTTCTGTCCATTCA     |
| NPHS2 | TTGGCACATCGATCCCTCAC    | CTTTGGCCTGTCTTTGTGCC   |
| ZO1   | ACCACCAACCCGAGAAGAC     | CAGGAGTCATGGACGCACA    |
| OCLN  | ACCCGAAGAAAGATGGATCG    | CATAGTCAGATGGGGGTGGA   |
| CLDN5 | CTCTGCTGGTTCGCCAACA     | CCCAGCTCGTACTTCTGTGACA |
| GAPDH | AGGTCGGTGTGAACGGATTTG   | GGGGTCGTTGATGGCAACA    |

**Table S1.** Sequences of primers for qRT-PCR
